# Supplementary material for: Myeloperoxidase Gene Deletion Causes Drastic Microbiome Shifts in Mice and Does Not Mitigate Dextran Sodium Sulphate-Induced Colitis
Source: MDPI journal article supplement (doi:10.3390/ijms25084258), 2024-04-11
Supplement: s1 [file s1]

# **Myeloperoxidase Gene Deletion Causes Drastic Microbiome Shifts in Mice and Does Not Mitigate Dextran Sodium Sulfate-Induced Colitis**

## **Supplementary Figures and legends**

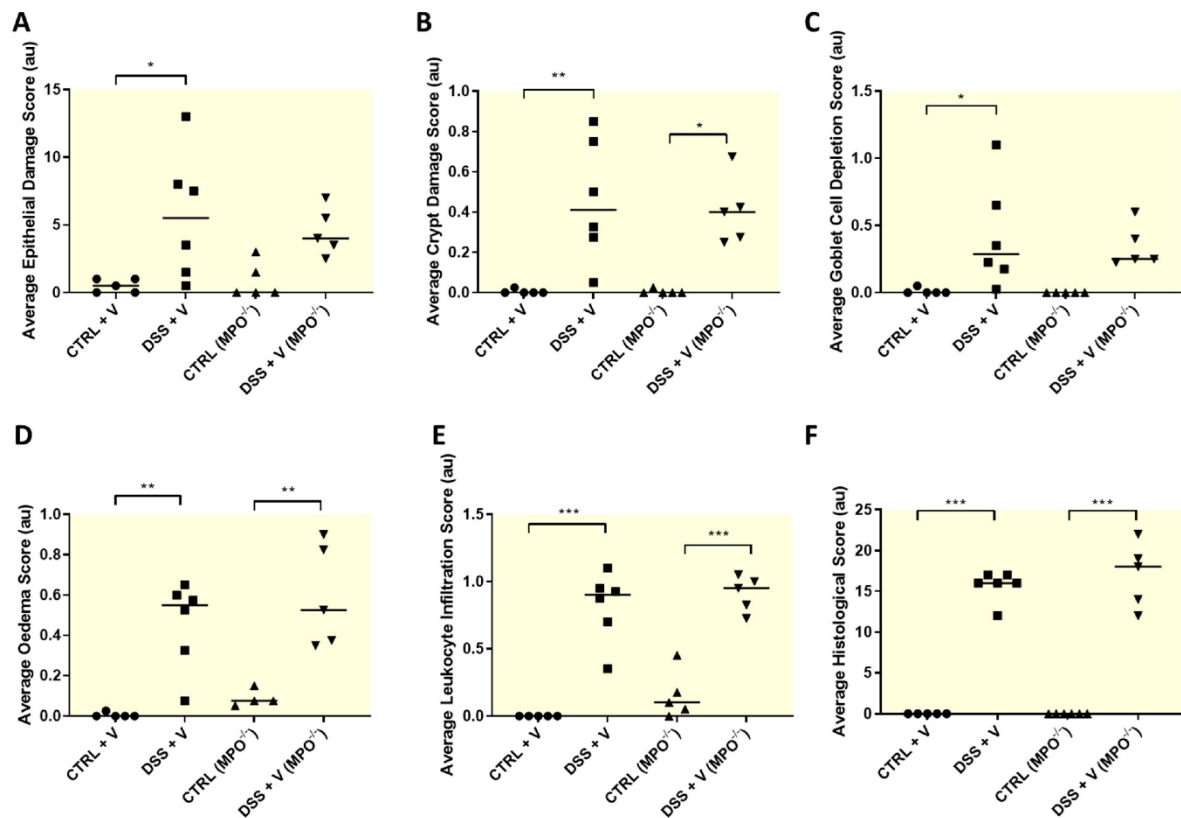

**Supplementary Figure S1.** Histopathological parameters scored on colons subjected to chronic DSS colitis. Colons from mice subjected to chronic DSS colitis were resected at model endpoint (D=63) and stained with haematoxylin & eosin. Semi-quantitative scoring of 20 random fields of view at 400x microscopic magnification (a score of between 0-2 per field of view for each parameter) of several histopathological parameters including A) epithelial damage, B) crypt damage, C) goblet cell depletion, D) level of oedema and E) level of leukocyte infiltration were assessed as markers of colitis severity. Enumeration of aforementioned scores yielded an F) average histological score for each experimental group. CTRL = control. DSS = dextran sodium sulfate. MPO KO = myeloperoxidase gene deficient. Data represented as mean  $\pm$  SD.  $n = 5$  Wt CTRL,  $n = 6$  Wt DSS,  $n = 4$  MPO<sup>-/-</sup> CTRL and  $n = 5$  MPO<sup>-/-</sup> DSS. \*  $p \leq 0.05$ , \*\*  $p \leq 0.01$ , \*\*\*  $p \leq 0.001$ .

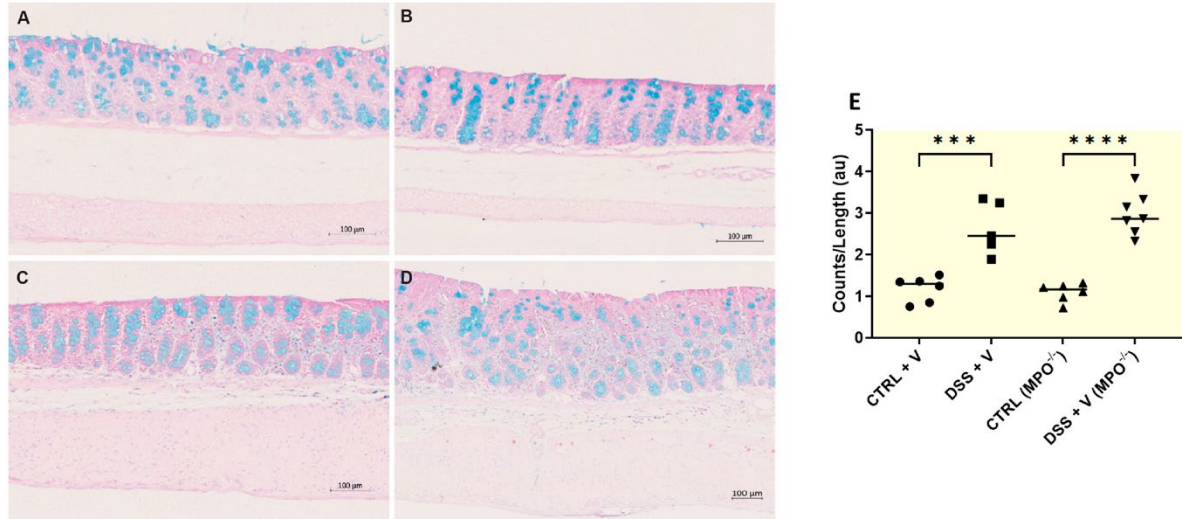

**Supplementary Figure S2.** Representative alcian blue and Safranin O staining of colonic section stains with quantification. Representative colon sections stained with Alcian blue and Safranin O after 63-day chronic colitis model of groups A) CTRL, B) MPO KO-CTRL, Wt-DSS, C) and D) MPO KO-DSS. E) Quantitative assessment of positive alcian blue and Safranin staining of mucin in colons subjected to chronic DSS colitis. CTRL = control. DSS = dextran sodium sulfate. MPO KO = myeloperoxidase gene deficient. Data represented as mean  $\pm$  SD.  $n = 6$ , all groups. \*\*\* $p \leq 0.001$  & \*\*\*\* $p \leq 0.0001$ .

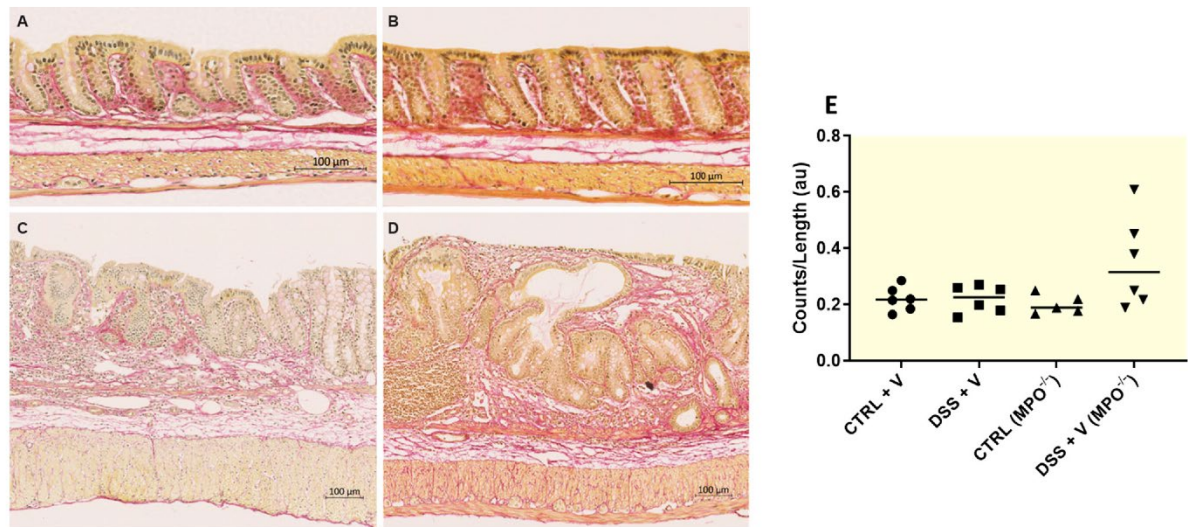

**Supplementary Figure S3.** Representative picosirius red staining of colonic section stains with quantification. Representative colon sections stained with after 63-day chronic colitis model of groups A) Wt-CTRL, B) MPO KO-CTRL, Wt-DSS, C) and D) MPO KO-DSS. E) Quantitative assessment of positive picosirius red staining of collagen in colons subjected to chronic DSS colitis. CTRL = control. DSS = dextran sodium sulfate. MPO KO = myeloperoxidase gene deficient. Data represented as mean  $\pm$  SD. n = 6, all groups.

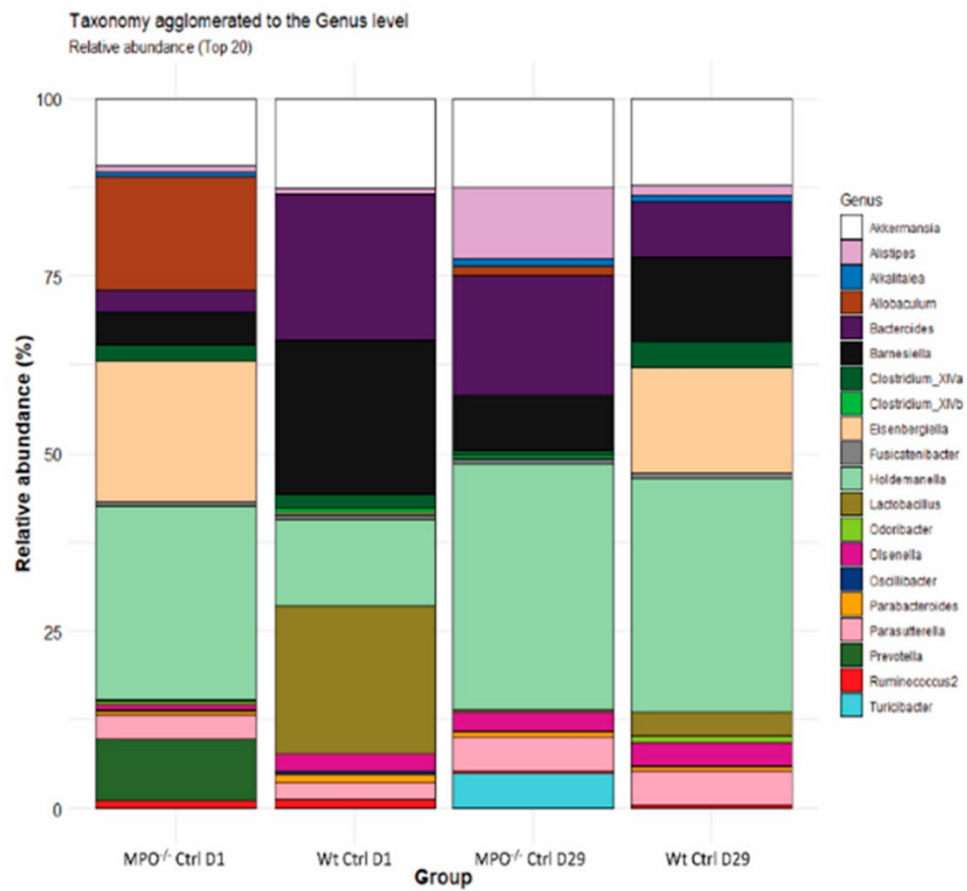

**Supplementary Figure S4.** Relative abundance of total bacterial genera in stool samples from Wt control and MPO KO control mice.

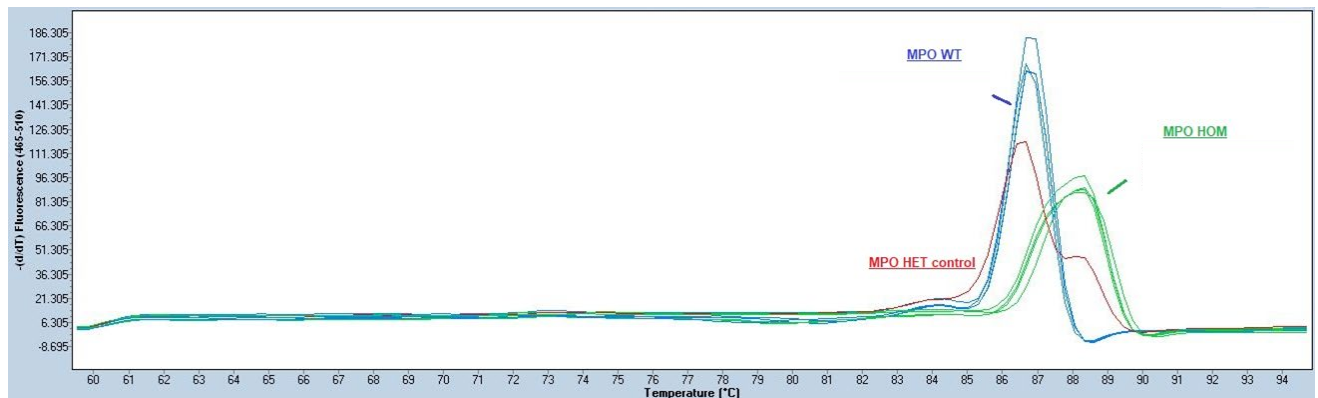

**Supplementary Figure S5.** RT-PCR high-resolution melting curve analysis of the MPO gene in randomly selected mice from Wt and MPO groups (n=3 per group). MPO WT = Wildtype mice, MPO HOM = Myeloperoxidase deficient mice, MPO HET control = Myeloperoxidase heterozygous control mice.

**Table S1.** Parameters assessed in colon histopathological scoring. Twenty random fields of view under 400x microscopic magnification were observed for colon sections stained with haematoxylin & eosin. A score between 0 and 2 was given for histopathological parameters including epithelium integrity, crypt integrity, level of goblet cell loss, extent of oedema and extent of leukocyte infiltration per field of view.

| Score | Epithelium Integrity | Crypt Integrity       | Goblet Cells  | Extent of Oedema           | Extent of Leukocyte Infiltration        |
|-------|----------------------|-----------------------|---------------|----------------------------|-----------------------------------------|
| 0     | Intact               | Intact                | Normal        | Absent                     | None                                    |
| 0.5   | Minimal damage       | Mostly intact         | Minor loss    | Minimal                    | Mild                                    |
| 1     | Partial shedding     | Partial loss          | Moderate loss | Submucosa only             | Moderate; lamina propria                |
| 1.5   | Severe damage        | Mostly destroyed      | Major loss    | Lamina propria & submucosa | Substantial; lamina propria & submucosa |
| 2     | Destroyed            | Entire crypt drop-out | Entire loss   | Transmural                 | Extensive; transmural                   |

**Table S2.** Antibodies and corresponding fluorochromes used in fluorescence-activated cell sorting. All antibodies obtained from Biolegend with the exception of GL3 from eBioscience.

| Target | Antibody Clone | Fluorochrome                                             | Catalogue Number |
|--------|----------------|----------------------------------------------------------|------------------|
| CD11b  | M1/70          | Allophycocyanin (APC)/Cyanine7 (Cy7)                     | 101226           |
| CD3    | 17A2           | Alexa Fluor® 488 (AF488)                                 | 100212           |
| CD4    | GK 1.5         | Peridinin-Chlorophyll-Protein (PerCP)/Cyanine5.5 (Cy5.5) | 100434           |
| CD45   | 30-F11         | Brilliant Violet 785™ (BV785)                            | 103149           |
| F4/80  | BM8            | R-phycoerythrin (PE)/Cyanine7 (Cy7)                      | 123114           |
| gdTCR  | GL3            | PE/Cyanine5 (Cy5)                                        | 15-5711-82       |
| I-Ab   | AF6-120.1      | Pacific Blue™ (PB)                                       | 116422           |
| IL-17  | TC11-18H10.1   | PE                                                       | 506904           |
| Ly6C   | HK1.4          | Brilliant Violet 605™ (BV605)                            | 128036           |
| Ly6G   | 1A8            | Alexa Fluor® 647 (AF647)                                 | 127610           |
